# Supplementary material for: Ultrasensitive detection of glutathione based on a switch-on fluorescent probe of AIE-type red-emitting copper nanoclusters
Source: Royal Society of Chemistry journal article supplement (doi:10.1039/c9ay00999j), 2019-01-01
Supplement: c9ay00999j1.pdf [file c9ay00999j1.pdf]

### Electronic Supplementary Information

**Table S1.** Comparison of different fluorescence probes for GSH detection based on MnO<sub>2</sub> nanosheets.

| Probes                                    | stokes shift<br>(nm) | LOD<br>(nM) | Assay time<br>(min) | Refs      |
|-------------------------------------------|----------------------|-------------|---------------------|-----------|
| Scopoletin & Amplex Red                   | 85 and 25            | 6.7         | Not given           | 10        |
| Boron nitride quantum dots                | 70                   | 160         | 6                   | 11        |
| Carbon dots                               | 75                   | 300         | 3                   | 23        |
| Carbon quantum dots                       | 97                   | 300         | 5                   | 24        |
| Graphene quantum dot                      | 90                   | 150         | 6                   | 25        |
| Semiconductor quantum dots                | 170                  | 10          | 10                  | 26        |
| BSA-Cu NCs                                | 75                   | 100         | 5                   | 27        |
| g-C <sub>3</sub> N <sub>4</sub> Nanosheet | 78                   | 200         | 6                   | 28        |
| AIE-silica nanospheres                    | 120                  | 200         | 5                   | 29        |
| Polymer dots                              | 100                  | 100         | 15                  | 41        |
| AIE-Cys-Cu NCs                            | 235                  | 1.2         | 3                   | This work |

**Table S2.** Nanosecond time-resolved luminescence transients of Cu NCs in the absence and presence of MnO<sub>2</sub> nanosheets. The luminescence of Cu NCs (maximum wavelength,  $\lambda_{\text{max}}=593$  nm) was detected with a 375 nm excitation laser. Numbers in parentheses indicate relative weightage.

| system                    | $\tau_1$<br>(ns) | $\tau_2$<br>(ns) | $\tau_{\text{av}}$<br>(ns) |
|---------------------------|------------------|------------------|----------------------------|
| Cu NCs                    | 6.26 (0.72%)     | 0.16 (99.28%)    | 0.2036                     |
| Cu NCs + MnO <sub>2</sub> | 6.36 (0.21%)     | 0.19 (99.79%)    | 0.2057                     |

**Table S3.** Determination result of GSH in human serum samples.

| Method                     | Sample 1 | Sample 2 | Sample 3 | Sample 4 | Sample 5 |
|----------------------------|----------|----------|----------|----------|----------|
| This method/ $\mu\text{M}$ | 2.43     | 2.41     | 2.15     | 2.83     | 1.97     |
| OPA probe/ $\mu\text{M}$   | 2.38     | 2.27     | 2.09     | 2.78     | 2.06     |

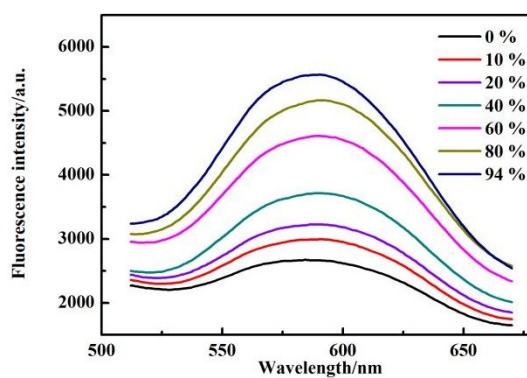

**Fig. S1.** The fluorescence spectra of the Cu NCs in mixed solvents of ethanol and water with different volumetric fractions of ethanol.

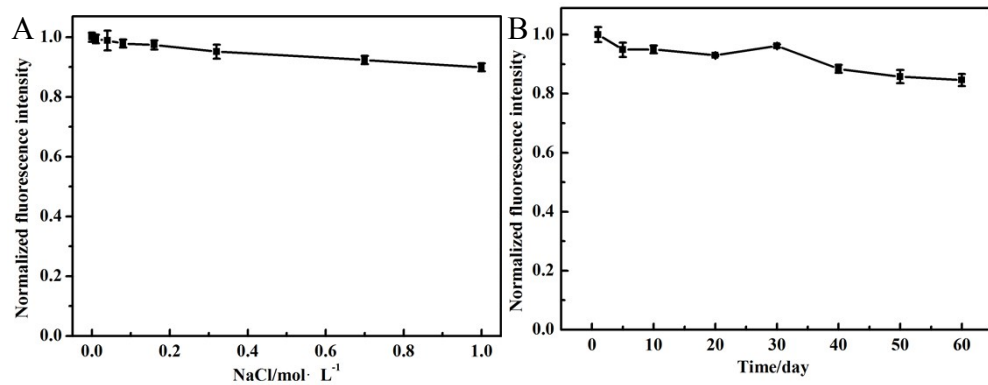

**Fig. S2.** (A) The effect of NaCl concentration on the FL response of Cu NCs. (B) The effect of storage time on FL response of Cu NCs.

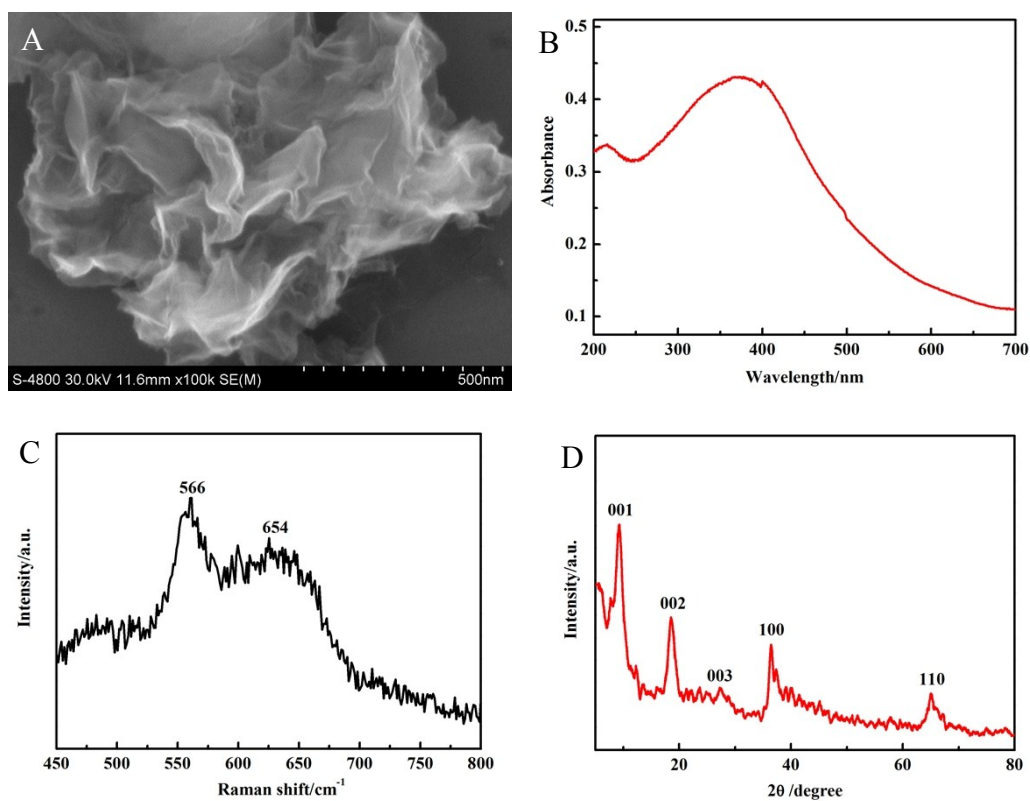

**Fig. S3.** The SEM image (A), the UV-Vis absorption spectra (B), Raman spectrum (C) and XRD spectra (D) of MnO<sub>2</sub> nanosheets.

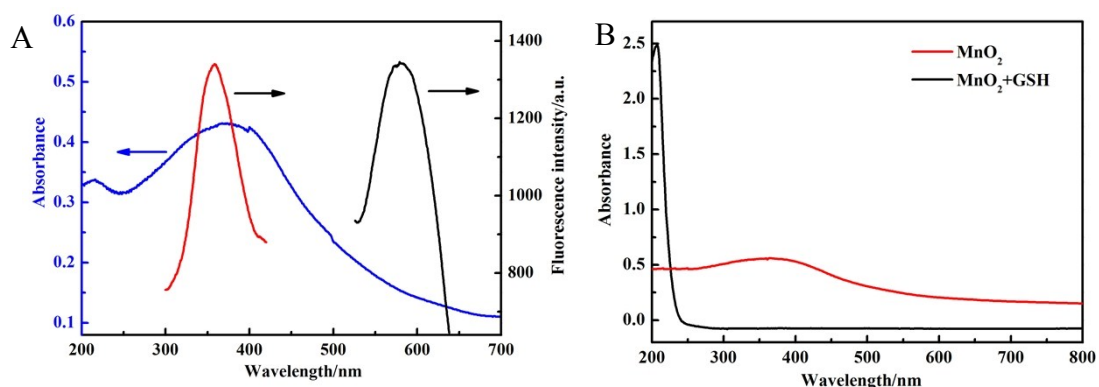

**Fig. S4.** (A) Fluorescence excitation (red curve) and emission (black curve) spectra of Cu NCs, and UV-vis absorption spectrum of MnO<sub>2</sub> nanosheets (blue curve). (B) UV-vis absorption spectrum of MnO<sub>2</sub> nanosheets in the absence (red line) and presence of GSH (black line).

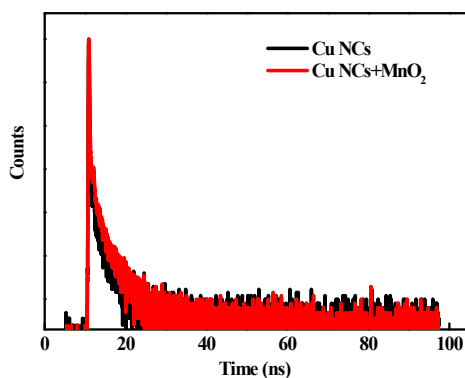

**Fig. S5.** Decay curves of Cu NCs in the absence and presence of MnO<sub>2</sub> nanosheets. The maximum excitation and emission wavelengths are 375 nm and 593 nm, respectively.

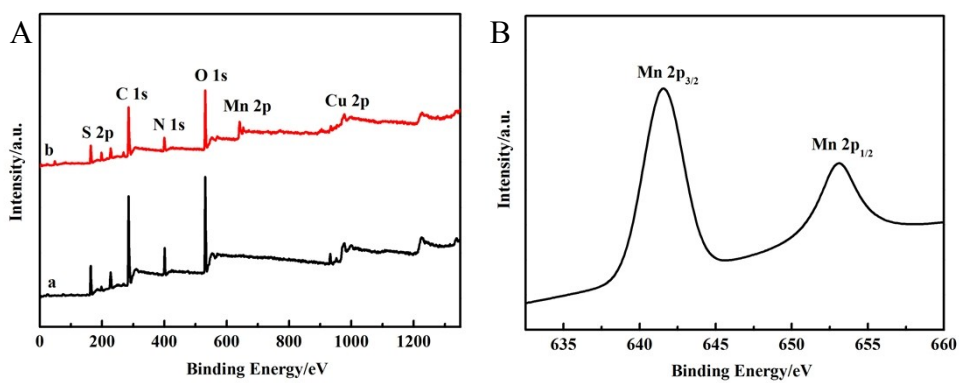

**Fig. S6.** (A) XPS spectra of Cu NCs in the absence (a) and presence of MnO<sub>2</sub> nanosheets (b). (B) XPS spectrum in the Mn 2p of Cu NCs-MnO<sub>2</sub> system.

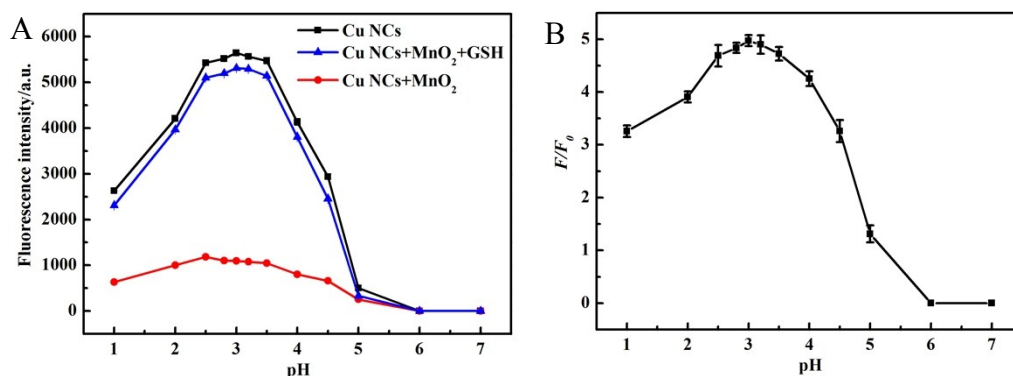

**Fig. S7.** (A) Effect of pH on the FL response of Cu NCs, Cu NCs-MnO<sub>2</sub> nanosheets and Cu NCs-MnO<sub>2</sub> nanosheets-GSH systems. (B) Effect of solution pH on  $F/F_0$  value. The concentrations of Cu NCs, MnO<sub>2</sub> nanosheets and GSH were 0.5 mM, 100  $\mu$ g/mL and 90  $\mu$ M, respectively. Error bars were the standard deviation of three independent experiments.

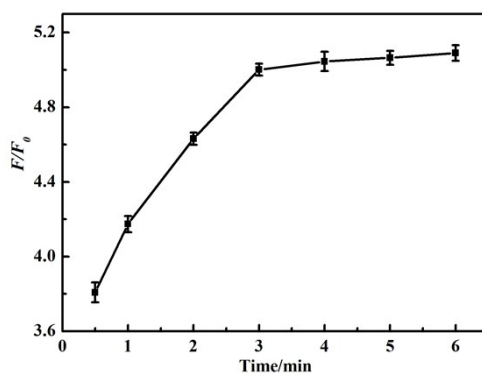

**Fig. S8.** Effect of reaction time on the fluorescence of Cu NCs-MnO<sub>2</sub> nanosheets system for detecting GSH. The concentrations of Cu NCs, MnO<sub>2</sub> nanosheets and GSH were 0.5 mM, 100  $\mu$ g/mL and 90  $\mu$ M, respectively. Error bars were the standard deviation of three independent experiments.
